# Supplementary material for: Association between tobacco control policies and hospital admissions for acute myocardial infarction in Thailand, 2006-2017: A time series analysis
Source: PubMed Central journal article supplement (PMC7710088; doi:10.1371/journal.pone.0242570), 2020-12-02
Supplement: pone.0242570.s001.pdf [file pone.0242570.s001.pdf]

## Association between tobacco control policies and hospital admissions for acute myocardial infarction in Thailand, 2006-2017:

### A time series analysis

Roengrudee Patanavanich and Stanton A. Glantz

**S1 Table. Association between tobacco control policies and AMI hospitalizations stratified on age (Poisson regression analysis)**

| Variables                              | Total Population                       |              | Age 18-44                              |              | Age 45-59                              |              | Age 60 and up                          |              |
|----------------------------------------|----------------------------------------|--------------|----------------------------------------|--------------|----------------------------------------|--------------|----------------------------------------|--------------|
|                                        | IRR<br>[95% CI]                        | p-value      | IRR<br>[95% CI]                        | p-value      | IRR<br>[95% CI]                        | p-value      | IRR<br>[95% CI]                        | p-value      |
| Average Cigarette Price<br>(in 10 THB) | 1.001<br>[0.992-1.008]                 | 0.942        | <b>0.954</b><br>[ <b>0.920-0.989</b> ] | <b>0.011</b> | 1.009<br>[0.993-1.026]                 | 0.252        | 0.997<br>[0.987-1.006]                 | 0.484        |
| 100% Smoke-Free Law                    | 1.007<br>[0.991-1.023]                 | 0.413        | <b>0.869</b><br>[ <b>0.807-0.937</b> ] | <b>0.001</b> | 0.98<br>[0.948-1.013]                  | 0.233        | <b>1.026</b><br>[ <b>1.006-1.046</b> ] | <b>0.010</b> |
| #Total admissions (in 1,000)           | 1.001<br>[0.999-1.003]                 | 0.146        | 1.004<br>[0.995-1.013]                 | 0.372        | 0.998<br>[0.994-1.002]                 | 0.405        | 1.002<br>[0.999-1.005]                 | 0.069        |
| Time                                   | <b>1.003</b><br>[ <b>1.003-1.004</b> ] | <b>0.001</b> | <b>1.007</b><br>[ <b>1.005-1.008</b> ] | <b>0.001</b> | <b>1.004</b><br>[ <b>1.003-1.005</b> ] | <b>0.001</b> | <b>1.004</b><br>[ <b>1.003-1.004</b> ] | <b>0.001</b> |
| Time2                                  | <b>0.999</b><br>[ <b>0.999-0.999</b> ] | <b>0.001</b> | 0.999<br>[0.999-1.000]                 | 0.241        | <b>0.999</b><br>[ <b>0.999-0.999</b> ] | <b>0.001</b> | <b>0.999</b><br>[ <b>0.999-0.999</b> ] | <b>0.001</b> |
| Total number of AMIs                   | 435,208                                |              | 21,233                                 |              | 105,783                                |              | 296,973                                |              |
| Observation                            | 131                                    |              | 131                                    |              | 131                                    |              | 131                                    |              |
| Pseudo R2                              | 0.927                                  |              | 0.457                                  |              | 0.826                                  |              | 0.903                                  |              |
